# Supplementary material
Source: PubMed Central journal article supplement (PMC11353711)
Supplement: NIHMS1620599-supplement-Supplemental.pdf [file NIHMS1620599-supplement-Supplemental.pdf]

**Supplemental Table 1. Associations of six-minute walk distance with lower extremity events, excluding individuals who had lower extremity amputation.**

|                                                                                          | <b>1<sup>st</sup> tertile HR<br/>(95% CI)<br/>(21-326 m)<br/>N=123</b> | <b>Pairwise<br/>P-value<br/>relative to<br/>3<sup>rd</sup> tertile</b> | <b>2<sup>nd</sup> tertile HR<br/>(95% CI)<br/>(327-412 m)<br/>N=124</b> | <b>Pairwise<br/>P-value<br/>relative<br/>to 3<sup>rd</sup><br/>tertile</b> | <b>3<sup>rd</sup> tertile HR<br/>(95% CI)<br/>(412-701 m)<br/>N=122</b> |
|------------------------------------------------------------------------------------------|------------------------------------------------------------------------|------------------------------------------------------------------------|-------------------------------------------------------------------------|----------------------------------------------------------------------------|-------------------------------------------------------------------------|
| <b>Model 1 adjusting for age, sex, race, BMI, smoking, comorbidities, and statin use</b> |                                                                        |                                                                        |                                                                         |                                                                            |                                                                         |
| <b>ABI decline &gt; 15%<br/>or lower extremity<br/>revascularization</b>                 | 1.68<br>(1.14, 2.47)                                                   | 0.009                                                                  | 1.14<br>(0.78, 1.68)                                                    | 0.50                                                                       | Reference                                                               |
| <b>Model 2 adjusting for variables in Model 1 + ABI</b>                                  |                                                                        |                                                                        |                                                                         |                                                                            |                                                                         |
| <b>ABI decline &gt; 15%<br/>or lower extremity<br/>revascularization</b>                 | 1.87<br>(1.24, 2.80)                                                   | 0.003                                                                  | 1.19<br>(0.81, 1.75)                                                    | 0.38                                                                       | Reference                                                               |

\*ABI, ankle brachial index; BMI, body mass index; CI, confidence interval; HR, hazard ratio

**Supplemental Table 2. Association of six-minute walk distance with lower extremity events excluding participants who underwent lower extremity revascularization.**

|                                                                                          | <b>1<sup>st</sup> tertile HR<br/>(95% CI)<br/>(21-326 m)<br/>N=123</b> | <b>Pairwise<br/>P-value<br/>relative to<br/>3<sup>rd</sup> tertile</b> | <b>2<sup>nd</sup> tertile HR<br/>(95% CI)<br/>(327-412 m)<br/>N=124</b> | <b>Pairwise<br/>P-value<br/>relative<br/>to 3<sup>rd</sup><br/>tertile</b> | <b>3<sup>rd</sup> tertile HR<br/>(95% CI)<br/>(412-701 m)<br/>N=122</b> |
|------------------------------------------------------------------------------------------|------------------------------------------------------------------------|------------------------------------------------------------------------|-------------------------------------------------------------------------|----------------------------------------------------------------------------|-------------------------------------------------------------------------|
| <b>Model 1 adjusting for age, sex, race, BMI, smoking, comorbidities, and statin use</b> |                                                                        |                                                                        |                                                                         |                                                                            |                                                                         |
| <b>ABI decline &gt;<br/>15% or critical<br/>limb ischemia or<br/>amputation</b>          | 1.56<br>(1.03, 2.36)                                                   | 0.034                                                                  | 1.06<br>(0.70, 1.61)                                                    | 0.79                                                                       | Reference                                                               |
| <b>Model 2 adjusting for variables in Model 1 + ABI</b>                                  |                                                                        |                                                                        |                                                                         |                                                                            |                                                                         |
| <b>ABI decline &gt;<br/>15% or critical<br/>limb ischemia or<br/>amputation</b>          | 1.78<br>(1.15, 2.74)                                                   | 0.009                                                                  | 1.12<br>(0.73, 1.71)                                                    | 0.60                                                                       | Reference                                                               |

\*ABI, ankle brachial index; BMI, body mass index; CI, confidence interval; HR, hazard ratio

**Supplemental Table 3: Association of six-minute walk distance with lower extremity events among participants with ankle brachial index < 0.90**

|                                                                                                      | <b>1<sup>st</sup> tertile HR<br/>(95% CI)<br/>(21-312 m)<br/>N=109</b> | <b>Pairwise<br/>P-value<br/>relative to<br/>3<sup>rd</sup> tertile</b> | <b>2<sup>nd</sup> tertile HR<br/>(95% CI)<br/>(316-403 m)<br/>N=110</b> | <b>Pairwise<br/>P-value<br/>relative<br/>to 3<sup>rd</sup><br/>tertile</b> | <b>3<sup>rd</sup> tertile HR<br/>(95% CI)<br/>(404-701 m)<br/>N=110</b> |
|------------------------------------------------------------------------------------------------------|------------------------------------------------------------------------|------------------------------------------------------------------------|-------------------------------------------------------------------------|----------------------------------------------------------------------------|-------------------------------------------------------------------------|
| <b>Model 1 adjusting for age, sex, race, BMI, smoking, comorbidities, and statin use</b>             |                                                                        |                                                                        |                                                                         |                                                                            |                                                                         |
| <b>All lower<br/>extremity<br/>outcomes</b>                                                          | 1.60<br>(1.06, 2.42)                                                   | 0.026                                                                  | 1.21<br>(0.80, 1.83)                                                    | 0.36                                                                       | Reference                                                               |
| <b>Model 2 adjusting for variables in Model 1 + ABI</b>                                              |                                                                        |                                                                        |                                                                         |                                                                            |                                                                         |
| <b>All Lower<br/>extremity<br/>outcomes</b>                                                          | 1.71<br>(1.12, 2.62)                                                   | 0.014                                                                  | 1.23<br>(0.82, 1.86)                                                    | 0.32                                                                       | Reference                                                               |
| <b>Model 1 adjusting for age, sex, race, BMI, smoking, comorbidities, and statin use</b>             |                                                                        |                                                                        |                                                                         |                                                                            |                                                                         |
| <b>Lower extremity<br/>revascularization</b>                                                         | 2.00<br>(0.97, 4.11)                                                   | 0.060                                                                  | 1.42<br>(0.70, 2.91)                                                    | 0.33                                                                       | Reference                                                               |
| <b>Model 2 adjusting for variables in Model 1 + ABI</b>                                              |                                                                        |                                                                        |                                                                         |                                                                            |                                                                         |
| <b>Lower extremity<br/>revascularization</b>                                                         | 2.07<br>(0.99, 4.36)                                                   | 0.055                                                                  | 1.43<br>(0.70, 2.93)                                                    | 0.33                                                                       | Reference                                                               |
| <b>Model 1 adjusting for age, sex, race, BMI, smoking, comorbidities, and statin use</b>             |                                                                        |                                                                        |                                                                         |                                                                            |                                                                         |
| <b>ABI decline &gt;<br/>15%**</b>                                                                    | 1.48<br>(0.92, 2.37)                                                   | 0.103                                                                  | 0.99<br>(0.62, 1.59)                                                    | 0.97                                                                       | Reference                                                               |
| <b>Model 2 adjusting for variables in Model 1 + ABI</b>                                              |                                                                        |                                                                        |                                                                         |                                                                            |                                                                         |
| <b>ABI decline &gt;<br/>15%**</b>                                                                    | 1.64<br>(1.01, 2.66)                                                   | 0.044                                                                  | 1.03<br>(0.64, 1.65)                                                    | 0.91                                                                       | Reference                                                               |
| <b>Model 1 adjusting for age, sex, race, body mass index, smoking, comorbidities, and statin use</b> |                                                                        |                                                                        |                                                                         |                                                                            |                                                                         |
| <b>Critical limb<br/>ischemia or<br/>amputation</b>                                                  | 11.68<br>(0.89, 152.47)                                                | 0.061                                                                  | 5.51<br>(0.44, 69.47)                                                   | 0.19                                                                       | Reference                                                               |
| <b>Model 2 adjusting for variables in Model 1 + ABI</b>                                              |                                                                        |                                                                        |                                                                         |                                                                            |                                                                         |
| <b>Critical limb<br/>ischemia or<br/>amputation</b>                                                  | 10.03<br>(0.73, 138.32)                                                | 0.085                                                                  | 5.51<br>(0.43, 70.07)                                                   | 0.19                                                                       | Reference                                                               |

\*ABI, ankle brachial index; BMI, body mass index; CI, confidence interval; HR, hazard ratio. \*\*4 people

are not in the analyses for ABI decline outcome only, 1 in the 1<sup>st</sup> tertile, 2 in the 2<sup>nd</sup> tertile and 1 in the 3<sup>rd</sup> tertile.

**Supplemental Table 4. Associations of Walking Impairment Questionnaire speed scores with lower extremity events among participants with ankle brachial index < 0.90**

|                                                                                          | <b>1<sup>st</sup> tertile<br/>HR (95% CI)<br/>(0.0-21.7)<br/>N=104</b> | <b>Pairwise<br/>P-value<br/>relative to<br/>3<sup>rd</sup> tertile</b> | <b>2<sup>nd</sup> tertile<br/>HR (95% CI)<br/>(22.8-43.5)<br/>N=107</b> | <b>Pairwise<br/>P-value<br/>relative<br/>to 3<sup>rd</sup><br/>tertile</b> | <b>3<sup>rd</sup> tertile<br/>HR (95% CI)<br/>(45.7-100.0)<br/>N=101</b> |
|------------------------------------------------------------------------------------------|------------------------------------------------------------------------|------------------------------------------------------------------------|-------------------------------------------------------------------------|----------------------------------------------------------------------------|--------------------------------------------------------------------------|
| <b>Model 1 adjusting for age, sex, race, BMI, smoking, comorbidities, and statin use</b> |                                                                        |                                                                        |                                                                         |                                                                            |                                                                          |
| <b>All lower extremity outcomes</b>                                                      | 1.60<br>(1.07, 2.39)                                                   | 0.023                                                                  | 0.91<br>(0.60, 1.39)                                                    | 0.66                                                                       | Reference                                                                |
| <b>Model 2 adjusting for variables in Model 1 + ABI</b>                                  |                                                                        |                                                                        |                                                                         |                                                                            |                                                                          |
| <b>All Lower extremity outcomes</b>                                                      | 1.77<br>(1.16, 2.70)                                                   | 0.008                                                                  | 0.94<br>(0.61, 1.44)                                                    | 0.77                                                                       | Reference                                                                |
| <b>Model 1 adjusting for age, sex, race, BMI, smoking, comorbidities, and statin use</b> |                                                                        |                                                                        |                                                                         |                                                                            |                                                                          |
| <b>Lower extremity revascularization</b>                                                 | 2.13<br>(1.02, 4.45)                                                   | 0.044                                                                  | 1.68<br>(0.80, 3.54)                                                    | 0.17                                                                       | Reference                                                                |
| <b>Model 2 adjusting for variables in Model 1 + ABI</b>                                  |                                                                        |                                                                        |                                                                         |                                                                            |                                                                          |
| <b>Lower extremity revascularization</b>                                                 | 2.24<br>(1.04, 4.80)                                                   | 0.038                                                                  | 1.71<br>(0.81, 3.61)                                                    | 0.16                                                                       | Reference                                                                |
| <b>Model 1 adjusting for age, sex, race, BMI, smoking, comorbidities, and statin use</b> |                                                                        |                                                                        |                                                                         |                                                                            |                                                                          |
| <b>ABI decline &gt; 15%**</b>                                                            | 1.44<br>(0.91, 2.26)                                                   | 0.12                                                                   | 0.74<br>(0.45, 1.21)                                                    | 0.23                                                                       | Reference                                                                |
| <b>Model 2 adjusting for variables in Model 1 + ABI</b>                                  |                                                                        |                                                                        |                                                                         |                                                                            |                                                                          |
| <b>ABI decline &gt; 15%**</b>                                                            | 1.66<br>(1.03, 2.67)                                                   | 0.037                                                                  | 0.78<br>(0.48, 1.27)                                                    | 0.32                                                                       | Reference                                                                |
| <b>Model 1 adjusting for age, sex, race, BMI, smoking, comorbidities, and statin use</b> |                                                                        |                                                                        |                                                                         |                                                                            |                                                                          |
| <b>Critical limb ischemia or amputation</b>                                              | NA                                                                     | NA                                                                     | NA                                                                      | NA                                                                         | Reference                                                                |
| <b>Model 2 adjusting for variables in Model 1 + ABI</b>                                  |                                                                        |                                                                        |                                                                         |                                                                            |                                                                          |
| <b>Critical limb ischemia or amputation</b>                                              | NA                                                                     | NA                                                                     | NA                                                                      | NA                                                                         | Reference                                                                |

**Supplemental Table 5. Association of Walking Impairment Questionnaire Distance Score with Lower Extremity Events With and Without Adjustment for Ankle-Brachial Index.**

|                                                                                          | <b>1<sup>st</sup> tertile<br/>HR (95%CI)<br/>(0.28-18.0)</b> | <b>Pairwise<br/>P-value<br/>relative to<br/>3<sup>rd</sup> tertile</b> | <b>2<sup>nd</sup> tertile<br/>HR (95%CI)<br/>(18.4-51.0)</b> | <b>Pairwise<br/>P-value<br/>relative<br/>to 3<sup>rd</sup><br/>tertile</b> | <b>3<sup>rd</sup> tertile<br/>HR (95%CI)<br/>(51.6-100)</b> |
|------------------------------------------------------------------------------------------|--------------------------------------------------------------|------------------------------------------------------------------------|--------------------------------------------------------------|----------------------------------------------------------------------------|-------------------------------------------------------------|
| <b>Model 1 adjusting for age, sex, race, BMI, smoking, comorbidities, and statin use</b> |                                                              |                                                                        |                                                              |                                                                            |                                                             |
| <b>All lower<br/>extremity<br/>outcomes</b>                                              | 1.29<br>(0.88, 1.88)                                         | 0.19                                                                   | 0.76<br>(0.52, 1.13)                                         | 0.17                                                                       | Reference                                                   |
| <b>Model 2 adjusting for variables in Model 1 + ABI</b>                                  |                                                              |                                                                        |                                                              |                                                                            |                                                             |
| <b>All lower<br/>extremity<br/>outcomes</b>                                              | 1.42<br>(0.94, 2.14)                                         | 0.09                                                                   | 0.80<br>(0.54, 1.18)                                         | 0.26                                                                       | Reference                                                   |

\*ABI, ankle brachial index; BMI, body mass index; CI, confidence interval; HR, hazard ratio

**Supplemental Table 6. Association of Walking Impairment Stair Climbing Score with Lower Extremity Events With and Without Adjustment for Ankle-Brachial Index**

|                                                                                          | <b>1<sup>st</sup> tertile<br/>HR (95% CI)<br/>(0.28-18.0)</b> | <b>Pairwise<br/>P-value<br/>relative to<br/>3<sup>rd</sup> tertile</b> | <b>2<sup>nd</sup> tertile<br/>HR (95% CI)<br/>(18.4-51.0)</b> | <b>Pairwise<br/>P-value<br/>relative<br/>to 3<sup>rd</sup><br/>tertile</b> | <b>3<sup>rd</sup> tertile<br/>HR (95% CI)<br/>(51.6-100)</b> |
|------------------------------------------------------------------------------------------|---------------------------------------------------------------|------------------------------------------------------------------------|---------------------------------------------------------------|----------------------------------------------------------------------------|--------------------------------------------------------------|
| <b>Model 1 adjusting for age, sex, race, BMI, smoking, comorbidities, and statin use</b> |                                                               |                                                                        |                                                               |                                                                            |                                                              |
| <b>All lower<br/>extremity<br/>outcomes</b>                                              | 1.32 (0.88, 1.98)                                             | 0.18                                                                   | 1.39 (0.95,<br>2.03)                                          | 0.09                                                                       | Reference                                                    |
| <b>Model 2 adjusting for variables in Model 1 + ABI</b>                                  |                                                               |                                                                        |                                                               |                                                                            |                                                              |
| <b>All lower<br/>extremity<br/>outcomes</b>                                              | 1.37 (0.91, 2.07)                                             | 0.13                                                                   | 1.41 (0.96,<br>2.06)                                          | 0.08                                                                       | Reference                                                    |

\*ABI, ankle brachial index; BMI, body mass index; CI, confidence interval; HR, hazard ratio

**Supplemental Table 7. Association of Physical Activity with Lower Extremity Events With and Without Adjustment for Ankle-Brachial Index.**

|                                                                                          | <b>1<sup>st</sup> tertile<br/>HR (95% CI)</b> | <b>Pairwise<br/>P-value<br/>relative to<br/>3<sup>rd</sup> tertile</b> | <b>2<sup>nd</sup> tertile<br/>HR (95% CI)</b> | <b>Pairwise<br/>P-value<br/>relative<br/>to 3<sup>rd</sup><br/>tertile</b> | <b>3<sup>rd</sup> tertile<br/>HR (95% CI)</b> |
|------------------------------------------------------------------------------------------|-----------------------------------------------|------------------------------------------------------------------------|-----------------------------------------------|----------------------------------------------------------------------------|-----------------------------------------------|
| <b>Model 1 adjusting for age, sex, race, BMI, smoking, comorbidities, and statin use</b> |                                               |                                                                        |                                               |                                                                            |                                               |
| <b>All lower<br/>extremity<br/>outcomes</b>                                              | 1.32<br>(0.87, 2.00)                          | 0.19                                                                   | 1.35<br>(0.92, 1.98)                          | 0.13                                                                       | Reference                                     |
| <b>Model 2 adjusting for variables in Model 1 + ABI</b>                                  |                                               |                                                                        |                                               |                                                                            |                                               |
| <b>All lower<br/>extremity<br/>outcomes</b>                                              | 1.32<br>(0.87, 2.00)                          | 0.19                                                                   | 1.34<br>(0.91, 1.96)                          | 0.14                                                                       | Reference                                     |

\*ABI, ankle brachial index; BMI, body mass index; CI, confidence interval; HR, hazard ratio

**Supplemental Table 8. Adjusted associations of resting in the six-minute walk test and time to onset of claudication in the six-minute walk test with lower extremity events among people with peripheral artery disease**

| Parameter                                                                                  | Parameter Estimate | Standard Error | P value | Hazard Ratio | 95% Hazard Ratio Confidence Limits |       |
|--------------------------------------------------------------------------------------------|--------------------|----------------|---------|--------------|------------------------------------|-------|
| Associations of any stopping during the six-minute walk test with lower extremity outcomes |                    |                |         |              |                                    |       |
| No stopping in six-minute walk test                                                        | Reference          | ---            | ---     | ---          | ---                                | ---   |
| Any stopping in six-minute walk test                                                       | 0.17200            | 0.18530        | 0.3533  | 1.188        | 0.826                              | 1.708 |
| Associations of time to claudication onset time with lower extremity outcomes*             |                    |                |         |              |                                    |       |
| Tertile 1 time to claudication onset (0.00 – 1.78 min.)                                    | -0.08094           | 0.26112        | 0.7566  | 0.922        | 0.553                              | 1.539 |
| Tertile 2 time to claudication onset (1.83 - 3.00 min.)                                    | -0.10208           | 0.26143        | 0.6962  | 0.903        | 0.541                              | 1.507 |
| Length of time resting in the six-minute walk test**                                       |                    |                |         |              |                                    |       |
| Tertile 2 for time resting during the 6-min. walk (0.05 – 0.63 minute)                     | 0.20221            | 0.24723        | 0.4134  | 1.224        | 0.754                              | 1.987 |
| Tertile 3 for time resting during the 6-min. walk (0.63 - 3.25 minutes)                    | -0.01153           | 0.25154        | 0.9634  | 0.989        | 0.604                              | 1.618 |

\* The reference group, Tertile 3, is the longest (best) time to claudication onset time. \*\* The reference group, Tertile 1, is the shortest (best) length of time resting in the six-minute walk test.

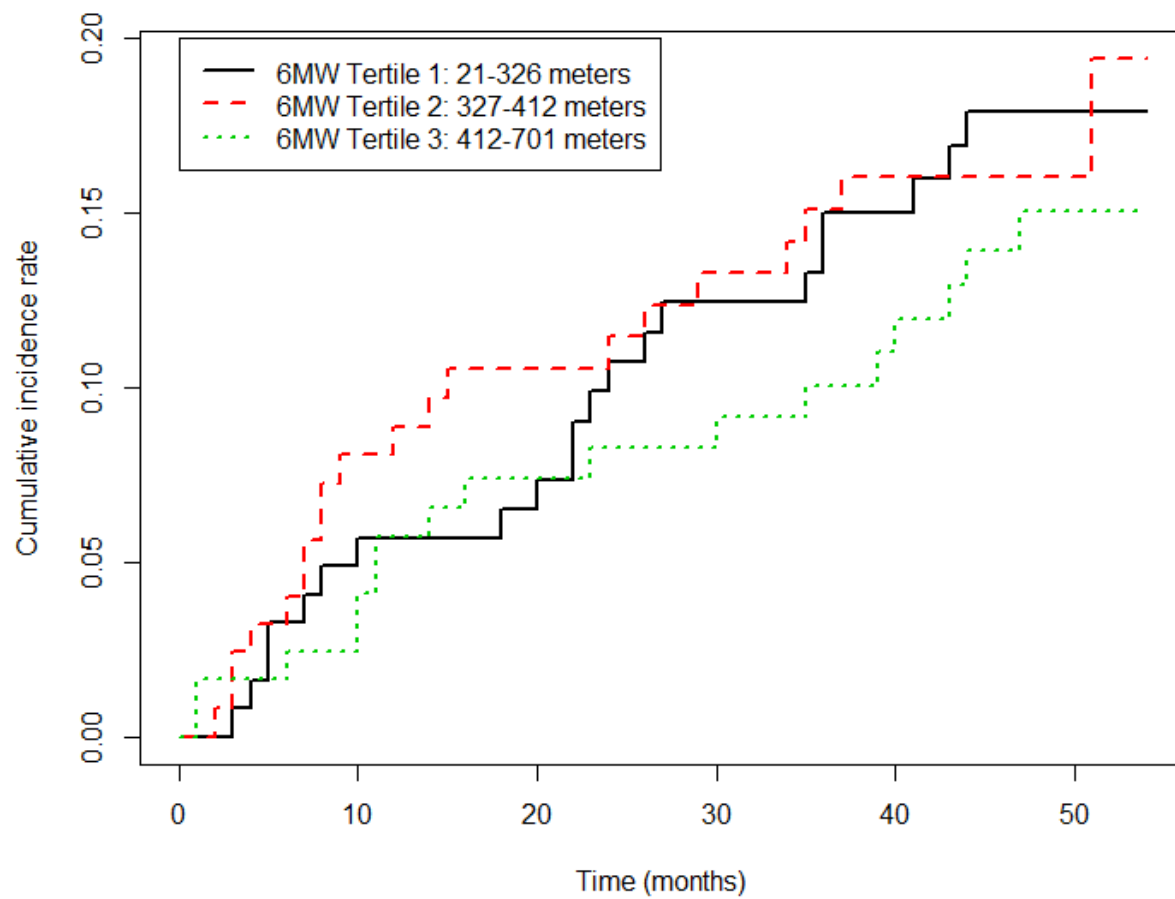

Supplemental Figure 1. Cumulative incidence of lower extremity revascularization according to six-minute walk distance tertile, with death from any cause as a competing risk factor.

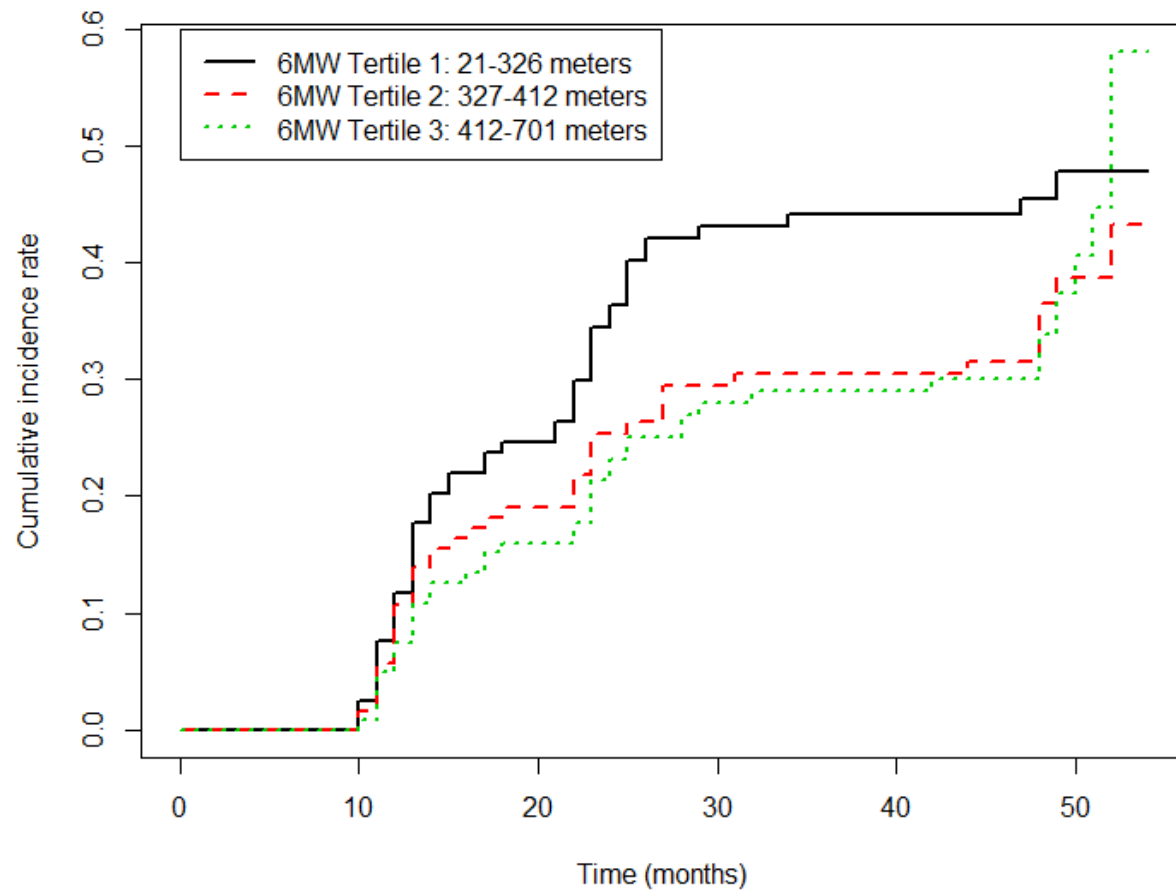

Supplemental Figure 2. Cumulative incidence of ABI decline >15% according to six-minute walk distance tertile, with death from any cause as a competing risk factor.

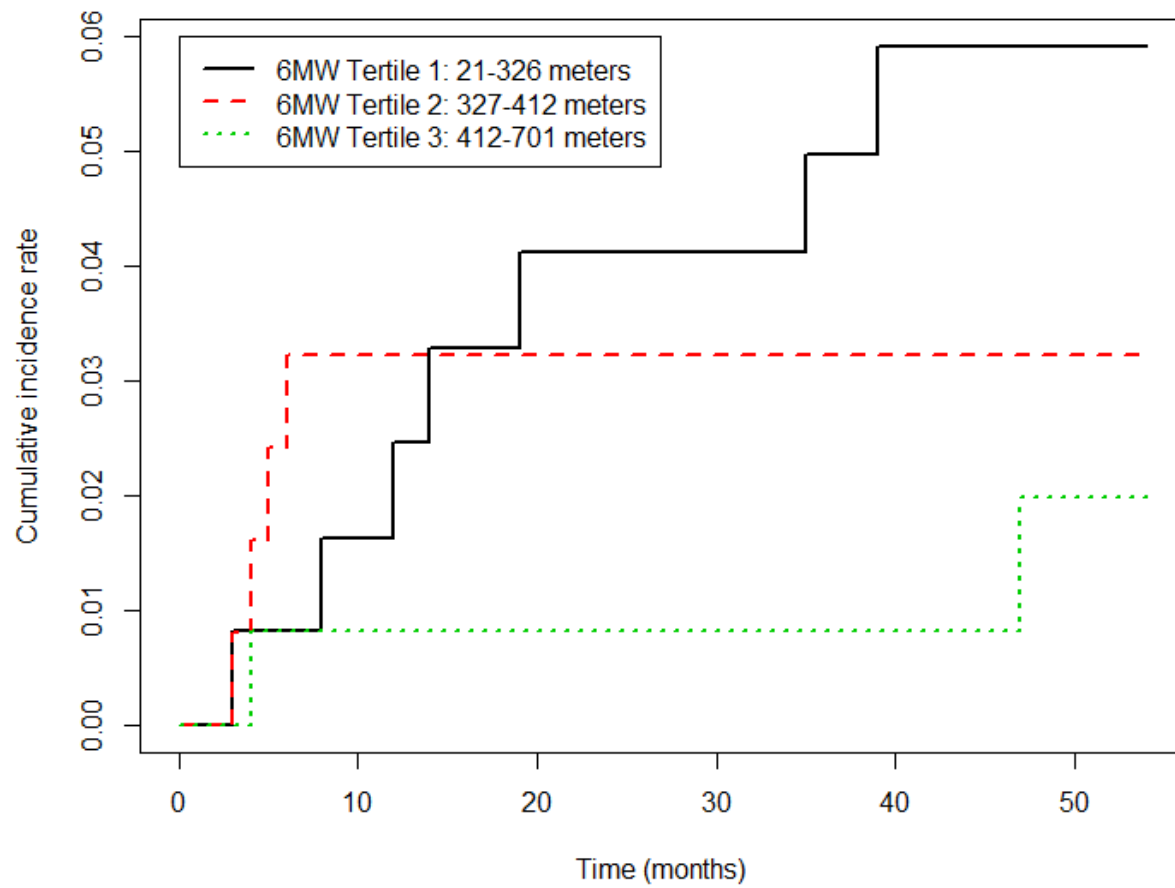

Supplemental Figure 3. Cumulative incidence of critical limb ischemia or amputation according to six-minute walk distance tertile, with death from any cause as a competing risk factor.
